# Supplementary material for: Rapid visual detection of aluminium ion using citrate capped gold nanoparticles
Source: Royal Society of Chemistry journal article supplement (doi:10.1039/c2an35129c), 2012-01-01
Supplement: c2an35129c.pdf [file c2an35129c.pdf]

## Electronic Supplementary Information (ESI) for

### Rapid visual detection of aluminum ion using citrate capped gold nanoparticles

Shan Chen, Yi-Min Fang, Qing Xiao, Ju Li, Song-Bo Li, Hong-Ju Chen, Jian-Jun Sun\*, Huang-Hao Yang\*

*Ministry of Education Key Laboratory of Analysis and Determination for Food Safety, Fujian Provincial Key Laboratory of Analysis and Detection for Food Safety, College of Chemistry & Chemical Engineering, Department of Chemistry, Fuzhou University, Fuzhou, 350108, China*

E-mail (J. J. Sun ): jjsun@fzu.edu.cn; Fax: +86 591 22866136; Tel: +86 591 22866136

E-mail (H .H. Yang): hhyang@fzu.edu.cn; Fax: +86 591 22866135; Tel: +86 591 22866135

#### Experimental details

Synthesis of Au nanoparticles. Au nanoparticles are synthesized with the traditional citrate reduction method. UV-vis absorption spectra were recorded by a spectrophotometer Lambda 750 Perkinelmer. TEM and HRTEM of Au nanoparticles are performed on a TECNAI F-20 high-resolution transmission electron microscope operating at 200 kV. All the other chemicals were of analytical grade. Deionized water (Millipore, Bedford, MA, USA) was used throughout.

Synthesis of Au nanoparticles. Au nanoparticles are synthesized with the traditional citrate reduction method. 1g  $\text{HAuCl}_4 \cdot 4\text{H}_2\text{O}$  was dissolved in 100 mL second-distilled water. 1.9 mL of the resulted  $\text{HAuCl}_4$  solution was diluted to 100 mL and heated up and in a flask with reflux while stirring. After the solution was boiling, 4 mL citrate solution ( $\text{C}_6\text{H}_5\text{Na}_3\text{O}_7 \cdot 2\text{H}_2\text{O}$ , 1.14g/100mL) was quickly added into the solution, allowed to react for 60 mins, resulting in red wine color Au nanoparticles solution.

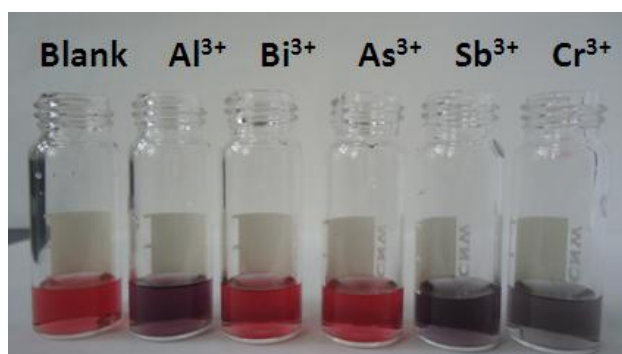

Fig. S1 Photograph of the solution with the addition of  $10^{-5}\text{M}$  different metal ions ( 51mg/L AuNPs, pH=2.9)
